# Supplementary material
Source: publisher figshare collection journal article supplement (https://frontiersin.figshare.com/ndownloader/files/33526214)

# SUPPLEMENTARY MATERIALS

**Table S1:** Summary of the WGS of each generation.

| Generation | Read count | Total nucleotides<br>(Gb) | Mapping% | Average<br>depth (x) | Percentage<br>of $\geq 10\times$<br>regions |
|------------|------------|---------------------------|----------|----------------------|---------------------------------------------|
| 0          | 8,810,400  | 881.04                    | 97.70%   | 187.46               | 99.05%                                      |
| 1          | 13,764,011 | 1376.40                   | 98.10%   | 292.85               | 99.05%                                      |
| 2          | 9,017,907  | 901.79                    | 94.50%   | 191.87               | 99.04%                                      |
| 3          | 9,212,062  | 921.21                    | 98.00%   | 196.00               | 99.04%                                      |
| 4          | 8,613,258  | 861.33                    | 97.90%   | 183.26               | 99.05%                                      |
| 5          | 8,073,276  | 807.33                    | 97.80%   | 171.77               | 99.04%                                      |
| 6          | 18,875,781 | 1887.58                   | 98.10%   | 401.61               | 99.05%                                      |
| 7          | 20,196,632 | 2019.66                   | 86.70%   | 429.72               | 99.05%                                      |
| 8          | 4,503,135  | 450.31                    | 98.10%   | 95.81                | 99.03%                                      |
| 9          | 5,376,502  | 537.65                    | 98.10%   | 114.39               | 99.03%                                      |
| 10         | 9,297,243  | 929.72                    | 98.10%   | 197.81               | 99.05%                                      |
| 11         | 20,667,315 | 2066.73                   | 98.10%   | 439.73               | 99.05%                                      |
| 12         | 16,140,953 | 1614.10                   | 98.10%   | 343.42               | 99.05%                                      |
| 13         | 9,315,677  | 931.57                    | 83.20%   | 198.21               | 99.04%                                      |
| 14         | 10,178,850 | 1017.89                   | 87.90%   | 216.57               | 99.04%                                      |
| 15         | 11,536,580 | 1153.66                   | 97.80%   | 245.46               | 99.05%                                      |
| 16         | 14,386,801 | 1438.68                   | 97.60%   | 306.10               | 99.05%                                      |
| 17         | 12,381,226 | 1238.12                   | 96.10%   | 263.43               | 99.05%                                      |
| 18         | 32,611,631 | 3261.16                   | 98.30%   | 693.86               | 99.05%                                      |
| 19         | 10,659,337 | 1065.93                   | 98.00%   | 226.79               | 99.05%                                      |
| 20         | 9,627,783  | 962.78                    | 96.70%   | 204.85               | 99.05%                                      |
| 21         | 14,283,937 | 1428.39                   | 98.00%   | 303.91               | 99.05%                                      |
| 22         | 11,183,570 | 1118.36                   | 92.00%   | 237.95               | 99.05%                                      |
| 23         | 12,073,814 | 1207.38                   | 98.00%   | 256.89               | 99.05%                                      |
| 24         | 12,050,429 | 1205.04                   | 97.90%   | 256.39               | 99.05%                                      |
| 25         | 24,878,208 | 2487.82                   | 98.10%   | 529.32               | 99.05%                                      |
| 26         | 18,767,112 | 1876.71                   | 98.00%   | 399.30               | 99.05%                                      |
| 27         | 16,503,457 | 1650.35                   | 97.90%   | 351.14               | 99.05%                                      |
| 28         | 22,084,659 | 2208.47                   | 98.00%   | 469.89               | 99.05%                                      |
| 29         | 18,396,227 | 1839.62                   | 98.10%   | 391.41               | 99.05%                                      |
| 30         | 20,220,073 | 2022.01                   | 96.40%   | 430.21               | 99.05%                                      |
| 31         | 22,557,079 | 2255.71                   | 89.70%   | 479.94               | 99.05%                                      |
| 32         | 16,819,259 | 1681.93                   | 98.00%   | 357.86               | 99.05%                                      |
| 33         | 25,595,880 | 2559.59                   | 98.10%   | 544.59               | 99.05%                                      |
| 34         | 23,207,842 | 2320.78                   | 98.00%   | 493.78               | 99.07%                                      |
| 35         | 17,124,280 | 1712.43                   | 98.40%   | 364.35               | 99.05%                                      |
| 36         | 3,710,807  | 371.08                    | 96.40%   | 78.95                | 99.01%                                      |
| 37         | 14,956,087 | 1495.61                   | 98.30%   | 318.21               | 99.05%                                      |
| 38         | 18,088,530 | 1808.85                   | 97.60%   | 384.86               | 99.05%                                      |
| 39         | 20,478,372 | 2047.84                   | 97.30%   | 435.71               | 99.06%                                      |
| 40         | 3,132,407  | 313.24                    | 93.40%   | 66.65                | 98.98%                                      |

|    |            |         |        |        |        |
|----|------------|---------|--------|--------|--------|
| 41 | 8,625,582  | 862.56  | 95.70% | 183.52 | 99.04% |
| 42 | 10,342,404 | 1034.24 | 96.70% | 220.05 | 99.03% |
| 43 | 11,303,880 | 1130.39 | 96.10% | 240.51 | 99.03% |
| 44 | 11,408,086 | 1140.81 | 95.90% | 242.73 | 99.03% |
| 45 | 11,757,863 | 1175.79 | 96.20% | 250.17 | 99.04% |

**Table S2:** SNV list (see Fig. 1C)

| Type       | Position | Mutation | CDS ID  | WP ID          | Gene        | Product                                                       |
|------------|----------|----------|---------|----------------|-------------|---------------------------------------------------------------|
| CDS        | 481432   | A>C      | cds486  | WP_000101737.1 | <i>acrR</i> | transcriptional regulator                                     |
|            | 3871241  | G>A      | cds3922 | WP_000072067.1 | <i>gyrB</i> | DNA gyrase subunit B                                          |
|            | 3916926  | T>G      | cds3965 | WP_000932839.1 | <i>rsmG</i> | ribosomal RNA small subunit                                   |
|            | 3916927  | G>A      |         |                |             | methyitransferase G                                           |
|            | 3917493  | C>A      | cds3966 | WP_000499788.1 | <i>mnmG</i> | tRNA uridine(34) 5-carboxymethyl-aminomethyl synthesis enzyme |
|            | 4174942  | A>T      | cds4194 | WP_000263098.1 | <i>rpoB</i> | DNA-directed RNA polymerase subunit beta                      |
| non-coding | 1972746  | C>T      |         |                |             |                                                               |

**Figure S1:** The K-means clustering with 4 clusters in the trend analysis of the transcriptome over the time (see Fig. 2D). Basically, the cluster 2+4 here correspond to the Cluster 1 in Fig. 2D, and the cluster 1+3 correspond to the Cluster 2 in Fig. 2D.

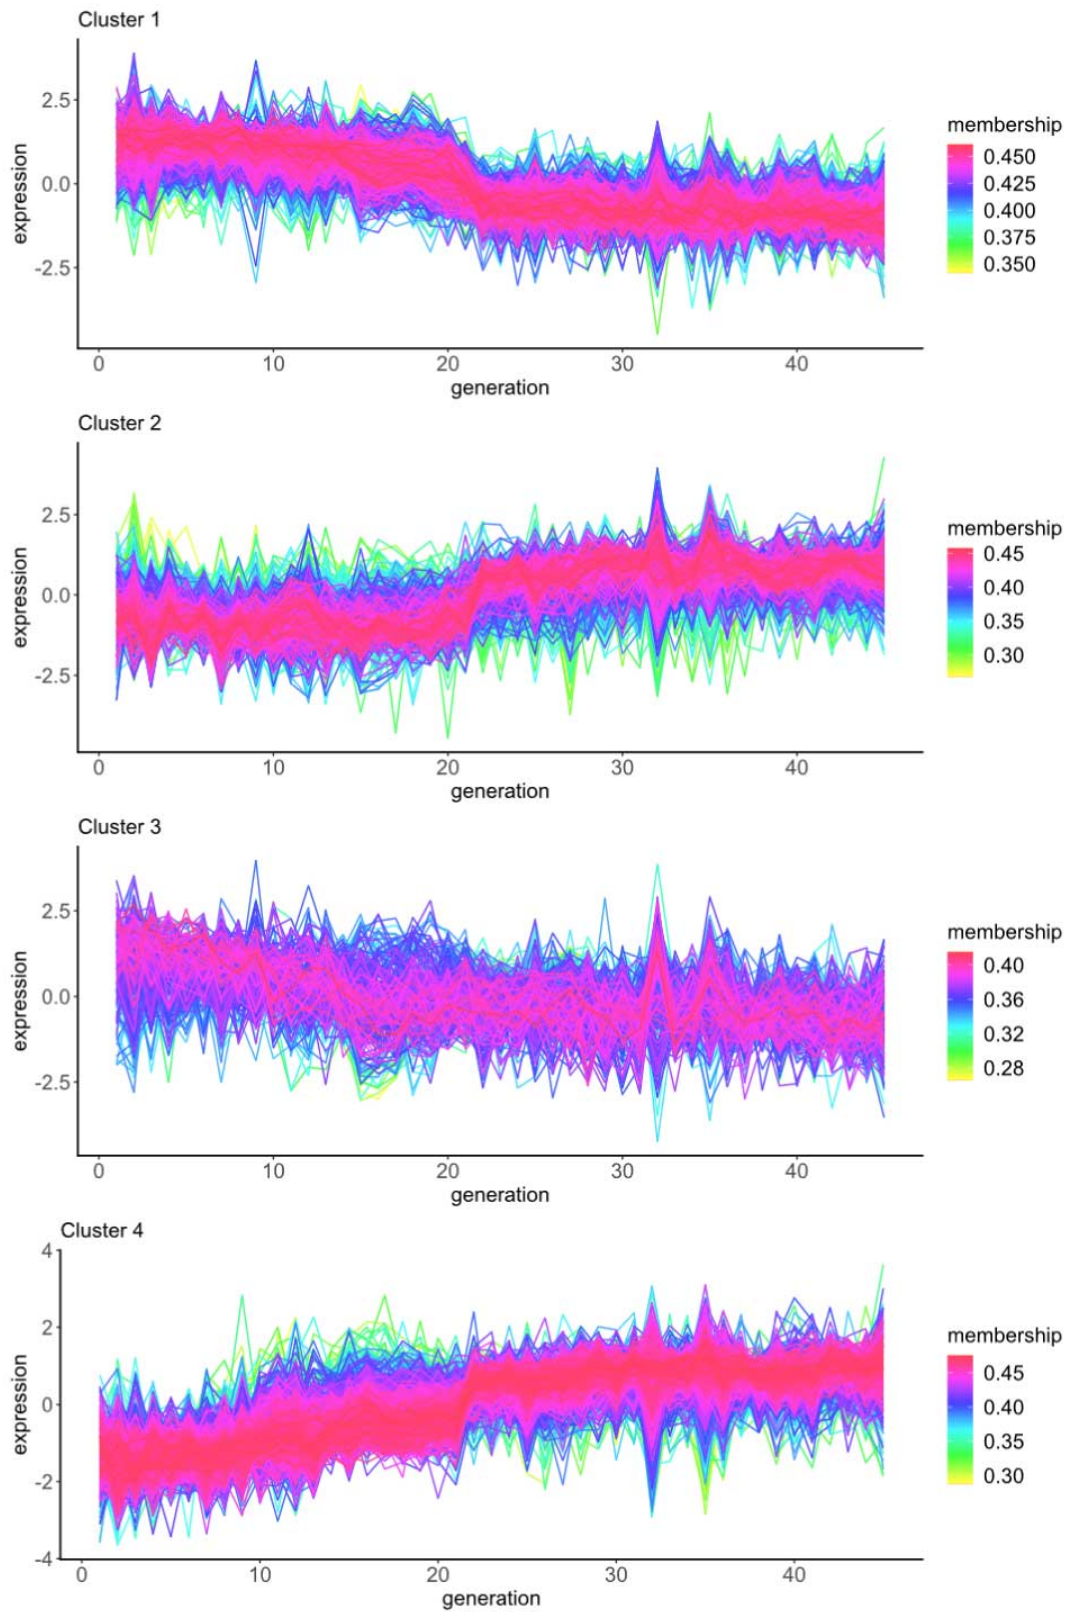

**Figure S2:** MGISEQ-2000 reads that supports inversion events near tRNA genes illustrated in Fig. 4D~G. Red dashed line denotes the inversion junction point. Genome positions represent the *E. coli* BW25113 reference genome coordinate. Each horizontal line denotes one paired-end read. Arrows illustrates the mapped position of both ends and the mapped direction (right = mapped to forward strand; left = mapped to reverse strand). (A) The inversion junction in Fig. 4D~E. (B) The inversion junction in Fig. 4F~G.

**A**

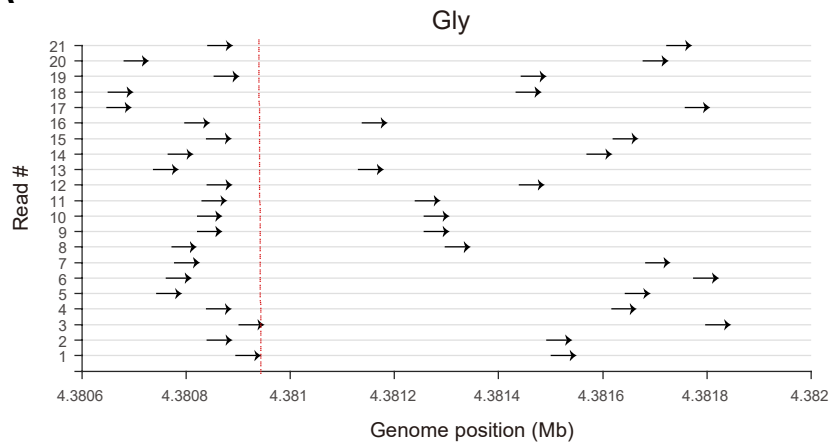

**B**

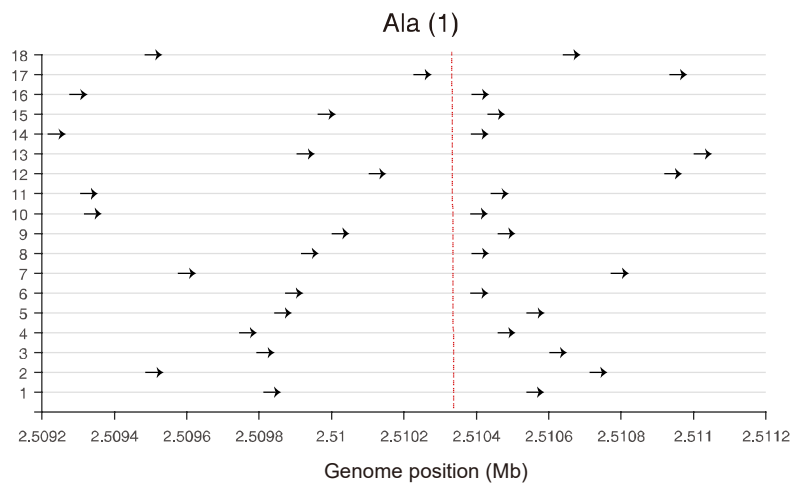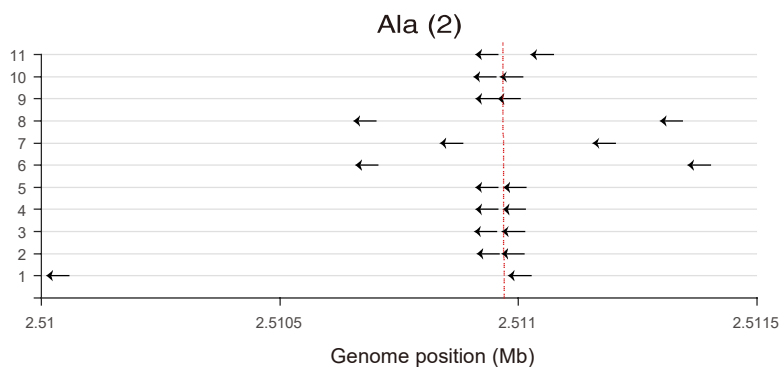

**Figure S3:** Up-regulation of tRNA-Gly-GCC-1-1 during subculturing.

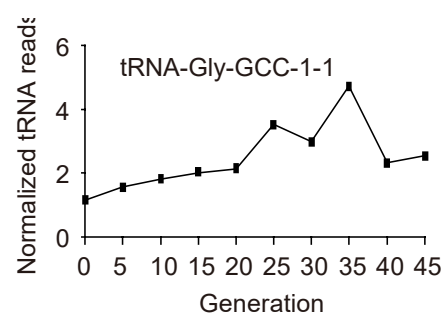

**Figure S4:** Vectors construction. Synthesized 3-gly-tRNA tandem was constructed into the red segment of pRIL plasmid, replaced the origin tRNA genes in the pRIL. The pRIL plasmid without tRNA genes were used as negative control.

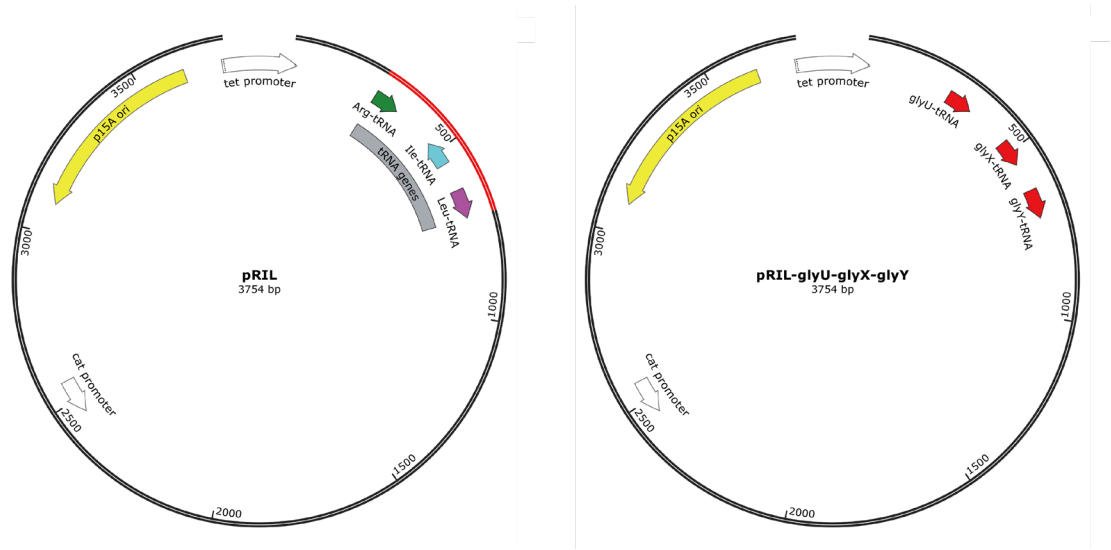

**Figure S5:** An example of a deletion which started at the 21<sup>st</sup> generation. This deletion affected *mnmG* gene encoding tRNA-processing enzyme. (A) Position of the deletion and the Sanger sequencing validation. (B) PCR validation using primers in the flanking sequences. The “original” mark denotes the expected band if there’s no deletion, and the “deleted” mark denotes the expected size of the product with deletion. (C) The expression level of the *mnmG* gene in the RNA-seq data. (D) The structure of MnmG protein (PDB: 3CP2). Blue and green domains are two domains according to the CATH Protein Structure Classification Database v4.3 (<https://www.cathdb.info/>). Blue domain is the catalytic domain which binds nucleic acids. The truncated fragment caused by the deletion is marked as light orange color.

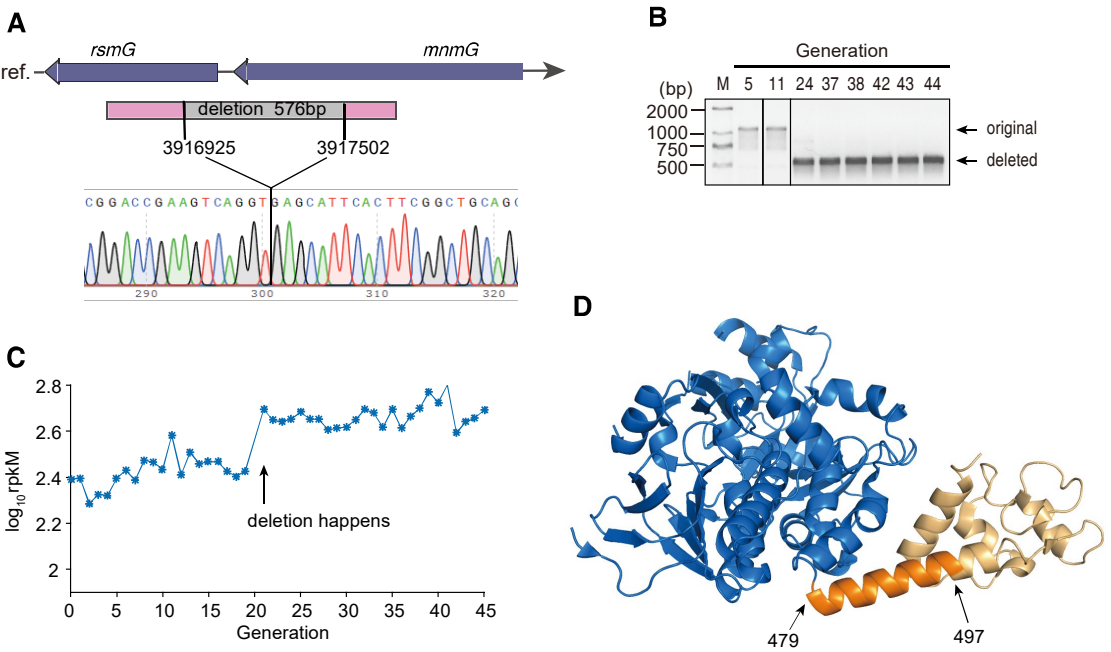

Supplement: Supplementary file [file 33526214]
